# Supplementary material for: Control of phosphodiesterase activity in the regulator of biofilm dispersal RbdA from Pseudomonas aeruginosa
Source: Royal Society of Chemistry journal article supplement (doi:10.1039/d4cb00113c), 2024-01-01
Supplement: d4cb00113c1.pdf [file d4cb00113c1.pdf]

**Supplement to:**

**Control of phosphodiesterase activity in the regulator of biofilm dispersal RbdA from *Pseudomonas aeruginosa***

Charlotte Cordery<sup>a,b,c,d</sup>, Jack Craddock<sup>a,b</sup>, Martin Malý<sup>a</sup>, Kieran Basavaraja<sup>a,b,c,d</sup>, Jeremy S. Webb<sup>a,b</sup>, Martin A. Walsh<sup>c,d</sup> and Ivo Tews<sup>a,b</sup>

<sup>a</sup> Biological Sciences, Institute for Life Sciences, University of Southampton, Southampton, SO17 1BJ, UK

<sup>b</sup> National Biofilms Innovation Centre, University of Southampton, Southampton, SO17 1BJ, UK

<sup>c</sup> Diamond Light Source, Harwell Science and Innovation Campus, Didcot, Oxfordshire, OX11 0DE, UK

<sup>d</sup> Research Complex at Harwell, Harwell Science and Innovation Campus, Didcot, Oxfordshire, OX11 0FA, UK

Address correspondence to Ivo Tews, ivo.tews@soton.ac.uk

This supplement contains:

Supplementary Table S1

Supplementary figures S1+S2

| Colour | MS volume (Å <sup>3</sup> ) | SA volume (Å <sup>3</sup> ) | Pocket MS area (Å <sup>3</sup> ) | Pocket SA area (Å <sup>3</sup> ) | Openings # | lining amino acids                                                                                                                                      |
|--------|-----------------------------|-----------------------------|----------------------------------|----------------------------------|------------|---------------------------------------------------------------------------------------------------------------------------------------------------------|
| green  | 430.8                       | 56.2                        | 403.6                            | 144.1                            | 0          | Ser5, Tyr6, Gly9, Glu10, Trp13, Asp49, Met52, Ile70, Asn75, Ile83, <b>Phe96</b> , Leu102, <b>Trp103</b> , Gly106, Val148, Ala151, Ala152, <b>Phe155</b> |
| green  | 13.2                        | 0.0                         | 27.1                             | 0.0                              | 0          | <b>Phe96</b> , Ile100, <b>Trp103</b> , <b>Phe155</b>                                                                                                    |
| blue   | 35.3                        | 0.2                         | 59.1                             | 3.2                              | 0          | Trp13, Pro46, Arg50, Asp107, <b>Val110</b>                                                                                                              |
| grey   | 22.5                        | 0.1                         | 39.4                             | 1.1                              | 0          | Gly9, Leu12, <b>Asp49</b> , Gly73, Asn75                                                                                                                |
| purple | 51.2                        | 1.2                         | 72.0                             | 8.4                              | 0          | Gln17, Tyr109, <b>Val110</b> , Leu113, Ile144, <b>Val148</b>                                                                                            |

**Table S1.** Analysis of cavities in the RbdA periplasmic domain RbdA<sub>38-201</sub> (computed model, AF2). Color code relates to amino acids lining the cavity as seen in Figure S2. The largest pocket volume is explored in Figure 4.

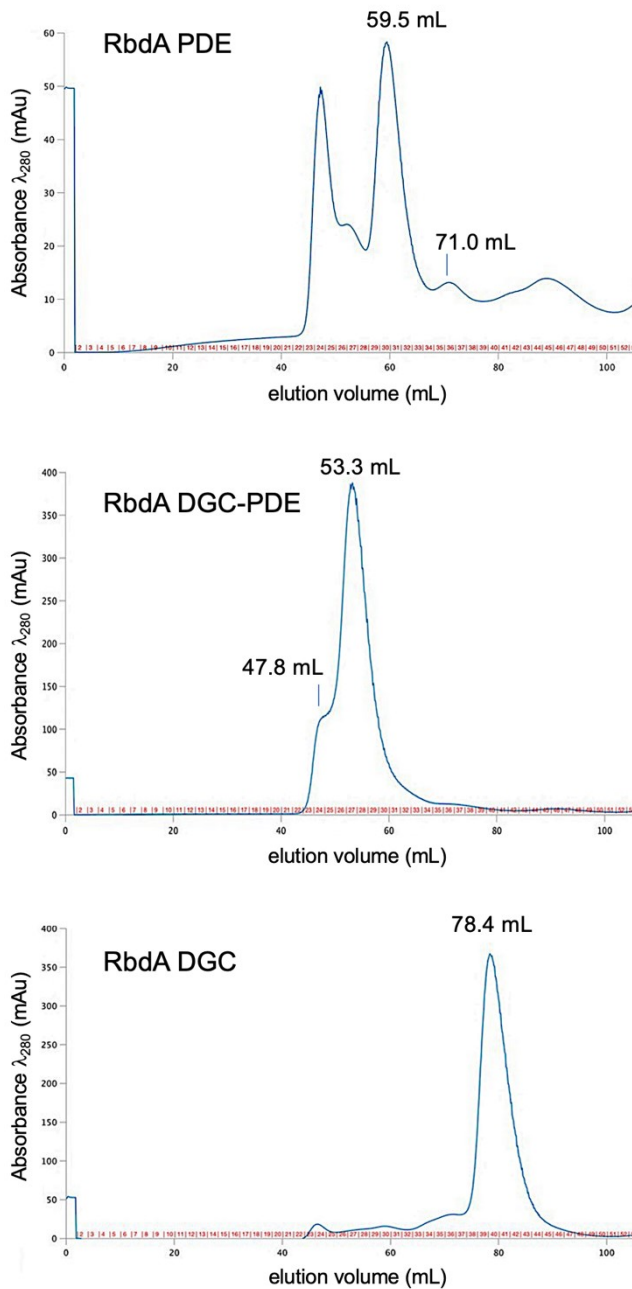

**Figure S1. Experimental size determination of RbdA constructs.** The PDE domain (RbdA<sub>549-797</sub>) mainly eluted as a dimer at approximately 59.5 mL, with a small peak present for the monomer at approximately 71 mL. The linked DGC-EAL construct (RbdA<sub>376-797</sub>) eluted as a dimer at approximately 53.3 mL. The autonomous DGC domain was (mainly) monomeric (RbdA<sub>376-536</sub>) and eluted at approximately 78.4 mL. Determined using a HiLoad 16/600 Superdex 75 prep grade column.

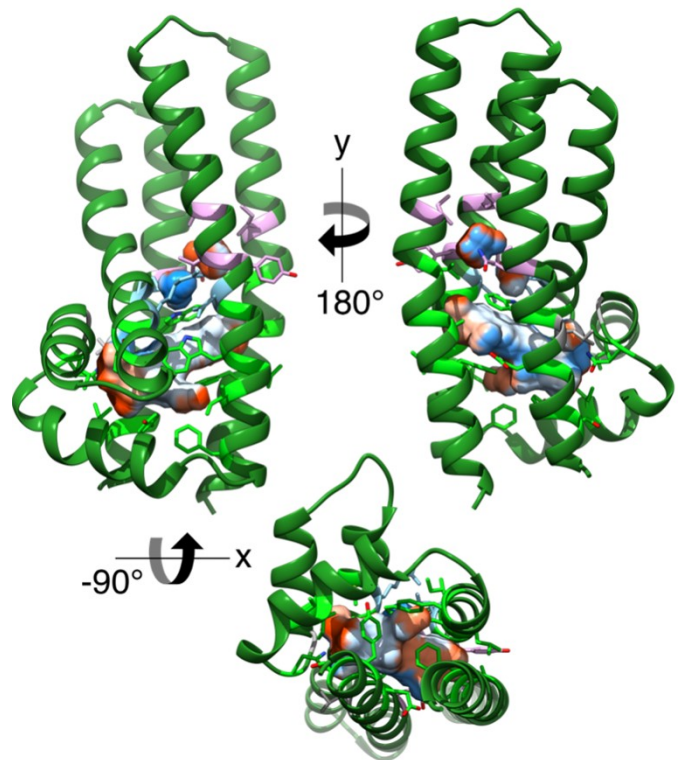

**Figure S2. Computed model of RbdA<sub>38-201</sub> periplasmic domain.** The colors indicate amino acids lining different pockets as given in Table S1. Selected amino acid side chains lining the pockets are shown as sticks.

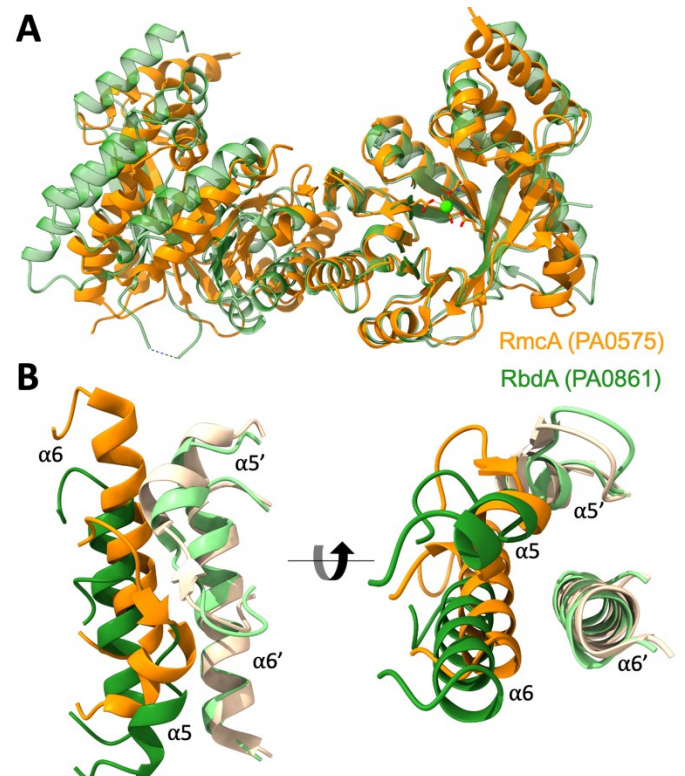

**Figure S3. Superposition of RbdA (green, translucent) and RmcA (orange, solid; 5M3C<sup>54</sup>).** **A**, the dimerisation interface, cartoon representation; compare Figure 1. **B**, helices  $\alpha 5$  and  $\alpha 6$  from the interface in RmcA (orange and light orange) with a small  $\beta$ -sheet, as opposed to RbdA (dark and light green).
